# Supplementary material for: Rheology, Microstructure, and Storage Stability of Emulsion-Filled Gels Stabilized Solely by Maize Starch Modified with Octenyl Succinylation and Pregelatinization
Source: PubMed Central journal article supplement (PMC8069085; doi:10.3390/foods10040837), 2021-04-12
Supplement: foods-10-00837-s001.pdf [file foods-10-00837-s001.pdf]

# Rheology, microstructure, and storage stability of emulsion-filled gels stabilized solely by maize starch modified with octenyl succinylation and pregelatinization

Myeongsu Jo<sup>1,2,†</sup>, Min Jea Chang<sup>4,†</sup>, Kelvin K. T. Goh<sup>5</sup>, Choongjin Ban<sup>6,\*\*</sup> and Young Jin Choi<sup>1,2,3,\*</sup>

<sup>1</sup> Department of Agricultural Biotechnology, Seoul National University, Seoul 08826, Republic of Korea; cms05517@snu.ac.kr (M.J.)

<sup>2</sup> Center for Food and Bioconvergence, Seoul National University, Seoul 08826, Republic of Korea

<sup>3</sup> Research Institute of Agriculture and Life Sciences, Seoul National University, Seoul 08826, Republic of Korea

<sup>4</sup> Dongsuh Foods Corporation, Incheon 21314, Republic of Korea; mjjang@dongsuh.co.kr (M.J.C.)

<sup>5</sup> School of Food and Advanced Technology, Massey University, Palmerston North 4442, New Zealand; K.T.Goh@massey.ac.nz (K.K.T.G.)

<sup>6</sup> Department of Environmental Horticulture, University of Seoul, Seoul 02504, Republic of Korea

\* Correspondence: choiyj@snu.ac.kr (Y.J.C.); pahncj@uos.ac.kr (C.B.); Tel.: +82 2 880 4851 (Y.J.C.)

† Co-first authors, these authors contributed equally to this work

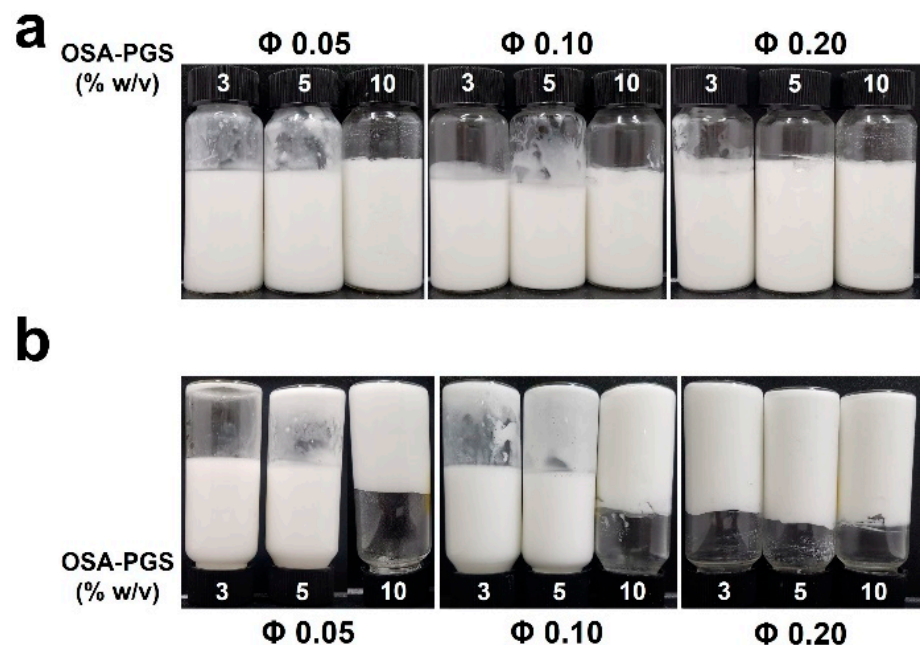

**Figure S1.** Appearance of the emulsions stabilized by 3, 5, and 10% *w/v* pregelatinized maize starch modified with octenyl succinic anhydride (OSA-PGS) ( $\Phi$ , oil volume fraction). Side views of vials placed (a) upright and (b) inverted after the emulsion preparation.

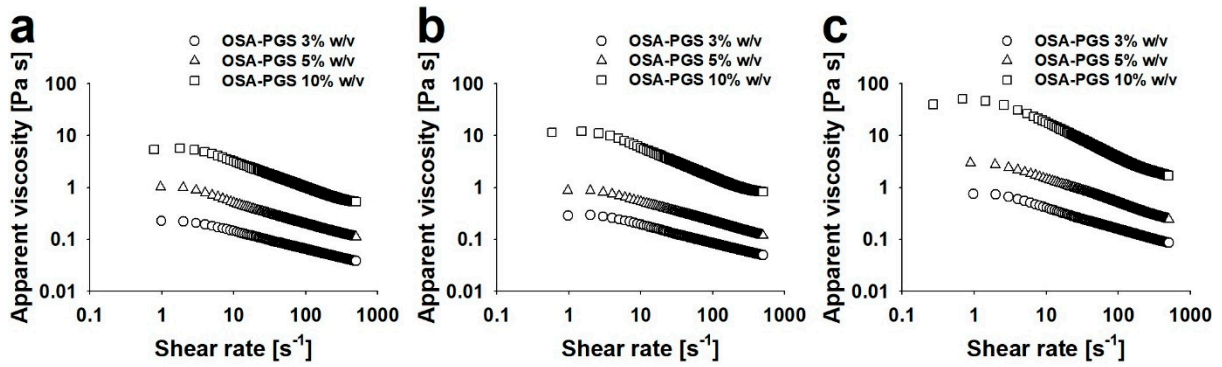

**Figure S2.** Apparent viscosity of emulsions stabilized by pregelatinized maize starch modified with octenyl succinic anhydride (OSA-PGS). Oil volume fraction: (a) 0.05, (b) 0.10, and (c) 0.20. Data were obtained from flow behavior plots of shear stress *vs.* shear rate.

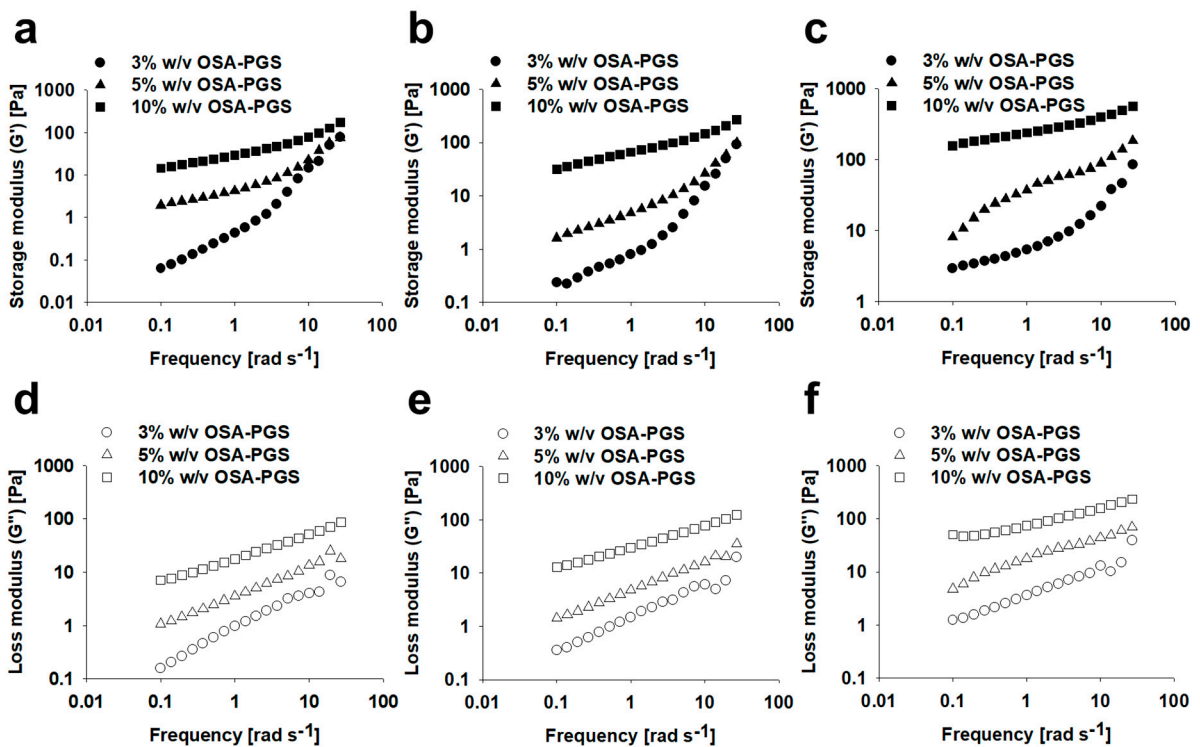

**Figure S3.** Loss ( $G''$ ) and storage ( $G'$ ) moduli of emulsions stabilized by pregelatinized maize starch modified with octenyl succinic anhydride (OSA-PGS). Oil volume fraction: (a and d) 0.05, (b and e) 0.10, and (c and f) 0.20. Data were obtained by oscillation frequency sweep test.
